1  
2  
3  
4  
5  
6  
7  
8  
9  
10  
11  
12  
13  
14  
15  
16  
17  
18  
19  
20  
21  
22

## **Enhanced proofreading governs CRISPR-Cas9 targeting accuracy**

Janice S. Chen<sup>1\*</sup>, Yavuz S. Dagdas<sup>2\*</sup>, Benjamin P. Kleinstiver<sup>3,4\*</sup>, Moira M. Welch<sup>3</sup>, Lucas B. Harrington<sup>1</sup>, Samuel H. Sternberg<sup>5†</sup>, J. Keith Joung<sup>3,4</sup>, Ahmet Yildiz<sup>1,6</sup>, Jennifer A. Doudna<sup>1,5,7-8</sup>

\*These authors contributed equally to this work.

<sup>1</sup>Department of Molecular and Cell Biology, University of California, Berkeley, California, 94720, USA. <sup>2</sup>Biophysics Graduate Group, University of California, Berkeley, California 94720, USA. <sup>3</sup>Molecular Pathology Unit, Center for Cancer Research, and Center for Computational and Integrative Biology, Massachusetts General Hospital, Charlestown, Massachusetts 02129, USA. <sup>4</sup>Department of Pathology, Harvard Medical School, Boston, Massachusetts 02115, USA. <sup>5</sup>Department of Chemistry, University of California, Berkeley, California 94720, USA. <sup>6</sup>Department of Physics, University of California, Berkeley, California 94720, USA. <sup>7</sup>Howard Hughes Medical Institute, University of California, Berkeley, California 94720, USA. <sup>8</sup>Physical Biosciences Division, Lawrence Berkeley National Laboratory, Berkeley, California 94720, USA.

†Present address: Caribou Biosciences, Inc. Berkeley, California 94710, USA.

23 **The RNA-guided CRISPR-Cas9 nuclease from *Streptococcus pyogenes* (SpCas9) has been**  
24 **widely repurposed for genome editing<sup>1-4</sup>. High-fidelity (SpCas9-HF1) and enhanced**  
25 **specificity (eSpCas9(1.1)) variants exhibit substantially reduced off-target cleavage in**  
26 **human cells, but the mechanism of target discrimination and the potential to further**  
27 **improve fidelity were unknown<sup>5-9</sup>. Using single-molecule Förster resonance energy transfer**  
28 **(smFRET) experiments, we show that both SpCas9-HF1 and eSpCas9(1.1) are trapped in**  
29 **an inactive state<sup>10</sup> when bound to mismatched targets. We find that a non-catalytic domain**  
30 **within Cas9, REC3, recognizes target mismatches and governs the HNH nuclease to**  
31 **regulate overall catalytic competence. Exploiting this observation, we identified residues**  
32 **within REC3 involved in mismatch sensing and designed a new hyper-accurate Cas9**  
33 **variant (HypaCas9) that retains robust on-target activity in human cells. These results**  
34 **offer a more comprehensive model to rationalize and modify the balance between target**  
35 **recognition and nuclease activation for precision genome editing.**

36

37 Efforts to minimize off-target cleavage by CRISPR-Cas9 have motivated the development of  
38 SpCas9-HF1 and eSpCas9(1.1) variants that contain amino acid substitutions predicted to  
39 weaken the energetics of target site recognition and cleavage<sup>8,9</sup> (**Figure 1a**). Biochemically, we  
40 found that these Cas9 variants cleaved the on-target DNA with rates similar to that of wild-type  
41 (WT) SpCas9, whereas their cleavage activity was significantly reduced on substrates bearing  
42 mismatches (**Extended Data Figure 1a, 2a**). To test the hypothesis that SpCas9 with its single-  
43 guide RNA (sgRNA) might exhibit a greater affinity for its target than is required for effective  
44 recognition<sup>9,11</sup>, we measured DNA binding affinity and cleavage of SpCas9-HF1 and  
45 eSpCas9(1.1) variants. Contrary to a potential hypothesis that mutating these charged residues to

46 alanine weakens target binding<sup>11</sup>, the affinities of these variants for on-target and PAM-distal  
47 mismatched substrates were similar to WT SpCas9 (**Figure 1b, Extended Data Figure 1a, 2b**),  
48 indicating that cleavage specificity is improved through a mechanism distinct from a simple  
49 reduction of target binding affinity<sup>11</sup>.

50 The HNH nuclease domain of SpCas9 undergoes a substantial conformational  
51 rearrangement upon target binding<sup>12-15</sup>, which activates the RuvC nuclease for concerted  
52 cleavage of both strands of the DNA<sup>12,16</sup>. We have previously shown that the HNH domain  
53 stably docks in its active state with an on-target substrate but becomes loosely trapped in an  
54 catalytically-inactive conformational checkpoint when bound to mismatched targets<sup>10</sup>,  
55 suggesting that SpCas9-HF1 and eSpCas9(1.1) variants may employ a more stringent checkpoint  
56 to promote off-target discrimination. To test this possibility, we labeled catalytically active WT  
57 SpCas9 (SpCas9<sub>HNH</sub>), SpCas9-HF1 (SpCas9-HF1<sub>HNH</sub>) and eSpCas9(1.1) (eSpCas9(1.1)<sub>HNH</sub>) with  
58 Cy3/Cy5 FRET pairs at positions S355C and S867C to measure HNH conformational states  
59 (**Figure 1c-f, Extended Data Figure 1c-e**)<sup>12</sup>. Whereas SpCas9<sub>HNH</sub> stably populated the active  
60 state with both on-target and mismatched substrates in steady-state smFRET histograms (**Figure**  
61 **1d**), only ~32% of SpCas9-HF1<sub>HNH</sub> molecules occupied the HNH active state ( $E_{\text{FRET}} = 0.97$ )  
62 with an on-target substrate, with the remaining ~68% trapped in the inactive intermediate state  
63 ( $E_{\text{FRET}} = 0.45$ ) (**Figure 1e**). However, when SpCas9-HF1<sub>HNH</sub> was bound to a substrate with just a  
64 single nucleotide mismatch at the PAM-distal end (20-20 bp mm), stable docking of the HNH  
65 nuclease was entirely ablated (**Figure 1e**). In addition, eSpCas9(1.1)<sub>HNH</sub> and other high fidelity  
66 variants<sup>8,9</sup> reduced the HNH active state in the presence of mismatches (**Figure 1f, Extended**  
67 **Data Figure 2c-d**). We therefore propose that high fidelity variants of Cas9 reduce off-target

68 cleavage by raising the threshold for HNH conformational activation when bound to DNA  
69 substrates.

70         Since the HNH domain does not directly contact nucleic acids at the PAM-distal end<sup>13,17-</sup>  
71 <sup>19</sup>, it is likely that a separate domain of Cas9 senses mismatches to govern HNH domain  
72 mobility. Structural studies suggest that a domain within the Cas9 recognition (REC) lobe  
73 (REC3) interacts with the RNA/DNA heteroduplex and undergoes conformational changes upon  
74 target binding (**Extended Data Figure 3**)<sup>13,14,17-19</sup>. Because the function of this non-catalytic  
75 domain was previously unknown, we labeled SpCas9 with Cy3/Cy5 dyes at positions S701C and  
76 S960C (SpCas9<sub>REC3</sub>) and observed that the conformational states of REC3 become more  
77 heterogeneous as PAM-distal mismatches increase (**Extended Data Figure 4a-c**). To determine  
78 whether PAM-distal sensing precedes HNH activation, we deleted REC3 from WT Cas9  
79 (SpCas9 $\Delta$ REC3) (**Figure 2a**). Deletion of REC3 decreased the cleavage rate by ~1000-fold  
80 compared to WT Cas9, despite retaining near-WT binding affinity with a perfect target  
81 (**Extended Data Figure 4d-f**). Unexpectedly, *in vitro* complementation of REC3 domain *in*  
82 *trans* rescued the on-target cleavage rate by ~100-fold in a concentration-dependent manner, but  
83 had no effect on cleavage with a PAM-distal mismatched target (**Figure 2b, Extended Data**  
84 **Figure 4e**). Furthermore, smFRET experiments revealed that the HNH domain in  
85 SpCas9 $\Delta$ REC3 (SpCas9 $\Delta$  REC3<sub>HNH</sub>) occupied the active state only when REC3 was  
86 supplemented *in trans* (**Figure 2c-d, Extended Data Figure 4f**). We therefore propose that  
87 REC3 acts as an allosteric effector that recognizes RNA/DNA heteroduplex to allow for HNH  
88 nuclease activation.

89         We next considered allosteric interactions that could couple the discontinuous REC3 and  
90 HNH domains. Structural studies suggested that REC2 occludes the HNH domain from the

91 scissile phosphate in the sgRNA-bound state<sup>19</sup>, and undergoes a large outward rotation upon  
92 binding to double-stranded DNA (dsDNA)<sup>13,14</sup> (**Figure 2e**). To test whether the REC2 domain  
93 regulates access of HNH to the target strand scissile phosphate, we labeled SpCas9 with  
94 Cy3/Cy5 dyes at positions E60C and D273C (SpCas9<sub>REC2</sub>) in order to detect REC2  
95 conformational changes (**Extended Data Figure 1b–c**). We observed reciprocal changes in bulk  
96 FRET values ( $(\text{ratio})_A$ )<sup>20</sup> between SpCas9<sub>HNH</sub> and SpCas9<sub>REC2</sub> across multiple DNA substrates  
97 (**Extended Data Figure 4g**), which suggest that the REC2 and HNH domains are tightly coupled  
98 to ensure catalytic competence. smFRET experiments further confirmed a large opening of  
99 REC2 during the transition from the sgRNA-bound state ( $E_{\text{FRET}} = 0.96$ ) to the target-bound state  
100 ( $E_{\text{FRET}} = 0.43$ ) (**Figure 2e–f**). In contrast to WT SpCas9<sub>REC2</sub>, SpCas9-HF1<sub>REC2</sub> occupies an  
101 intermediate state ( $E_{\text{FRET}} = 0.63$ ) when bound to a target with just a single PAM-distal mismatch  
102 (**Figure 2f–g**). Together with the observation that the HNH domain of SpCas9-HF1 does not  
103 occupy the active state in the presence of PAM-distal mismatches, these experiments suggest that  
104 REC2 sterically occludes and traps the HNH nuclease domain in the conformational checkpoint  
105 when SpCas9 is bound to off-target substrates.

106       Next, we investigated if this conformational proofreading mechanism could be rationally  
107 exploited to design a suite of novel hyper-accurate Cas9 variants. We identified five clusters of  
108 residues containing conserved amino acids within 5 Å of the RNA/DNA interface, four of which  
109 are located within REC3 and one in the HNH-RuvC Linker 2 (L2) (**Figure 3a, Extended Data**  
110 **Figure 5**). Alone or in combination with Q926A, a substitution within L2 that confers  
111 specificity<sup>9</sup>, we generated alanine substitutions for each residue within five different clusters of  
112 amino acids (Clusters 1-5 ± Q926A) (**Figure 3a**). We tested whether these cluster mutations  
113 affected off-target discrimination and equilibrium binding *in vitro*, and found that Cluster 1 alone

114 and Cluster 2 + Q926A exhibited the greatest suppression of off-target cleavage while retaining  
115 target binding affinities comparable to WT (**Extended Data Figure 6**). We next screened all  
116 cluster variants in human cells using an enhanced GFP (*EGFP*) disruption assay<sup>5</sup>. On-target  
117 activity for Cluster 1 was comparable to that of SpCas9-HF1 or eSpCas9(1.1), whereas Cluster 2  
118 variants displayed generally lower activity (**Figure 3b, Extended Data Figure 7a**). Furthermore,  
119 Cluster 1 retained high on-target activity (> 70% of WT) at 19/24 endogenous gene sites tested,  
120 compared to 18/24 for SpCas9-HF1 and 23/24 for eSpCas9(1.1) (**Figure 3c, Extended Data**  
121 **Figure 8a**).

122 We then focused on the specific contributions of mutations within Cluster 1 by restoring  
123 each individual mutated residue to its wild-type identity, along with the Q926A mutation, and  
124 testing the resulting variants for on-target editing efficiency in human cells. On-target activity  
125 was significantly compromised when N692A/Q695A/Q926A mutations occurred together, but  
126 restoring either N692 (Cluster 1 N692 + Q926A) or Q695 (Cluster 1 Q695 + Q926A) alone led  
127 to robust on-target efficiency comparable to Cluster 1, signifying differential contributions from  
128 these mutations to activity and specificity (**Extended Data Figure 7b-c, 8a-b**). Using sgRNAs  
129 with single mismatches against the endogenous human gene target *FANCF* site 1, we found that  
130 Cluster 1 exhibited even greater specificity than both SpCas9-HF1 and eSpCas9(1.1) in the  
131 middle and PAM proximal regions of the spacer, suggesting that mutating N692A and Q695A  
132 together may induce specificity in parts of the spacer sequence that were previously susceptible  
133 to off-target cleavage by high-fidelity Cas9 variants<sup>9</sup> (**Figure 3d, Extended Data Figure 8c**).  
134 Additional single mismatch tolerance assays on *FANCF* sites 4 and 6 further corroborated the  
135 superior accuracy of Cluster 1 (N692A/M694A/Q695A/H698A, referred to as HypaCas9)

136 against mismatches at positions 1 through 18; however, single mismatches along *FANCF* site 2  
137 were still tolerated across all SpCas9 variants tested (**Figure 3e, Extended Data Figure 8d, e**).

138 To biochemically validate cleavage specificity in the middle region of the spacer with  
139 HypaCas9, we measured cleavage rates against the *FANCF* site 1 sequence with or without  
140 internal mismatches at positions 10-12 of the spacer. Although HypaCas9 retained on-target  
141 activity comparable to WT and SpCas9-HF1 in human cells, its *in vitro* cleavage rate was  
142 slightly reduced for the one target site examined (**Figure 4a**). However, the cleavage rate with  
143 internally mismatched substrates was considerably slower compared to WT and SpCas9-HF1  
144 (**Figure 4a**). This activity may be explained by the altered threshold of HNH domain activation;  
145 whereas stable HNH docking was observed by SpCas9<sub>HNH</sub> and SpCas9-HF1<sub>HNH</sub> with both the  
146 *FANCF* site 1 on-target and mismatched substrate at the 12<sup>th</sup> position, this HNH active state by  
147 HypaCas9 (HypaCas9<sub>HNH</sub>) was diminished with the on-target. Nevertheless, HNH docking was  
148 nearly abolished when HypaCas9<sub>HNH</sub> was bound to a substrate with a single mismatch (**Figure**  
149 **4b**).

150 Our findings provide direct evidence to support previous speculation that Cas9 relies on  
151 PAM-distal protospacer sensing to enable accurate targeting<sup>21,22</sup>. In particular, we define REC3  
152 as an allosteric regulator of global Cas9 conformational changes to activate the nuclease  
153 domains, whose conformational threshold can be tuned for high-fidelity cleavage. Mutation of  
154 residues within REC3 that are involved in nucleic acid recognition, such as those mutated in  
155 HypaCas9 or SpCas9-HF1, prevents transitions by the REC lobe, which more stringently traps  
156 the HNH domain in the conformational checkpoint in the presence of mismatches (**Figure 4c,**  
157 **Extended Data Figure 9**). Curiously, nearly all of the amino acids within the cluster variants  
158 were strongly conserved (**Extended Data Figure 5**), suggesting that these residues may also be

159 involved in protospacer sensing and HNH nuclease activation across Cas9 orthologues.  
160 Furthermore, this observation may address how nature apparently has not selected for a highly  
161 precise Cas9 protein, whose native balance between mismatch tolerance and specificity may be  
162 optimized for host immunity. Our study therefore delineates a general strategy for improving  
163 Cas9 specificity by tuning conformational activation and offers innovative opportunities for  
164 rational design of hyper-accurate Cas9 variants that do not compromise efficiency.

165

166

167

168

169

170

171

172

173

174

175

176

177

178

179

180

181



182 **METHODS**

183

184 **Protein purification and dye labeling.** *S. pyogenes* Cas9 and truncation derivatives were cloned  
185 into a custom pET-based expression vector containing an N-terminal His<sub>6</sub>-tag, maltose-binding  
186 protein (MBP) and TEV protease cleavage site. Point mutations were introduced by Gibson  
187 assembly or around-the-horn PCR and verified by DNA sequencing. Proteins were purified as  
188 described<sup>23</sup>, with the following modifications: after Ni-NTA affinity purification and overnight  
189 TEV cleavage at 4°C, proteins were purified over an MBPTrap HP column connected to a  
190 HiTrap Heparin HP column for cation exchange chromatography. The final gel filtration step  
191 (Superdex 200) was carried out in elution buffer containing 20 mM Tris-HCl pH 7.5, 200 mM  
192 NaCl, 5% glycerol (v/v) and 1 mM TCEP. For FRET experiments, dye-labeled Cas9 samples  
193 were prepared as described<sup>12</sup>. A list of all protein variants and truncations are listed in

194 **Supplementary Table 1.**

195

196 **Nucleic acid preparation.** sgRNA templates were PCR amplified from a pUC19 vector  
197 containing a T7 promoter, 20 nt target sequence and optimized sgRNA scaffold. The amplified  
198 PCR product was extracted with phenol:chloroform:isoamylalcohol and served as the DNA  
199 template for sgRNA transcription reactions, which were performed as described<sup>24</sup>. DNA  
200 oligonucleotides and 5'end biotinylated DNAs (Supplementary Table 2) were synthesized  
201 commercially (Integrated DNA Technologies), and DNA duplexes were prepared and purified by  
202 native PAGE as described<sup>23</sup>.

203

204 **DNA cleavage and binding assays.** DNA duplex substrates were 5'-[<sup>32</sup>P]-radiolabeled on both  
205 strands. For cleavage experiments, Cas9 and sgRNA were pre-incubated at room temperature for  
206 at least 10 min in 1X binding buffer (20 mM Tris-HCl pH 7.5, 100 mM KCl, 5 mM MgCl<sub>2</sub>, 1  
207 mM DTT, 5% glycerol, 50 µg ml<sup>-1</sup> heparin) before initiating the cleavage reaction by addition of  
208 DNA duplexes. For REC3 *in vitro* complementation experiments, SpCas9ΔREC3 and sgRNA  
209 were pre-incubated with 10-fold molar excess of REC3 for at least 10 minutes at room  
210 temperature before addition of radiolabeled substrate. DNA cleavage experiments were  
211 performed and analyzed as previously described<sup>12</sup>. DNA binding assays were conducted in 1X  
212 binding buffer without MgCl<sub>2</sub> + 1 mM EDTA at room temperature for 2 hours. DNA-bound  
213 complexes were resolved on 8% native PAGE (0.5X TBE + 1 mM EDTA, without MgCl<sub>2</sub>) at  
214 4°C, as previously described<sup>10</sup>. Experiments were replicated at least three times, and presented  
215 gels are representative results.

216

217 **Bulk FRET experiments.** All bulk FRET assays were performed at room temperature in 1×  
218 binding buffer, containing 50 nM SpCas9<sub>HNH</sub> (C80S/S355C/C574S/S867C labeled with  
219 Cy3/Cy5), SpCas9ΔREC3<sub>HNH</sub>(M1–N497,GGG,V713–D1368 + C80S/S355C/C574S/S867C) or  
220 SpCas9<sub>REC2</sub> (E60C/C80S/D273C/C574S labeled with Cy3/Cy5) with 200 nM sgRNA and DNA  
221 substrate where indicated. Fluorescence measurements were collected and analyzed as  
222 described<sup>12</sup>. For REC3 *in vitro* complementation FRET experiments, SpCas9ΔREC3<sub>HNH</sub> and  
223 sgRNA were pre-incubated with 10-fold molar excess of REC3 for at least 10 minutes at room  
224 temperature before measuring bulk fluorescence.

225

226 **Sample preparation for smFRET assay.** 99% PEG and 1% biotinylated-PEG coated quartz  
227 slides were received from MicroSurfaces, Inc. Sample preparation was performed as previously  
228 described<sup>10</sup>. To immobilize SpCas9 on its DNA substrate, 2.5nM biotinylated-DNA substrate  
229 introduced and incubated in sample chamber for 5 min. Excess DNA was washed with 1×  
230 binding buffer. SpCas9-sgRNA complexes were prepared by mixing 50 nM Cas9 and 50nM  
231 sgRNA in 1× binding buffer and incubated for 10 min at room temperature. SpCas9-sgRNA was  
232 diluted to 100 pM, introduced to sample chamber and incubated for 10 min. Before data  
233 acquisition, 20 μL imaging buffer (1 mg ml<sup>-1</sup> glucose oxidase, 0.04 mg ml<sup>-1</sup> catalase, 0.8%  
234 dextrose (w/v) and 2 mM Trolox in 1× binding buffer) was flown into chamber. The REC3 *in*  
235 *vitro* complementation assay was performed similar to steady-state FRET experiments: 2.5nM  
236 biotinylated-DNA substrate (on-target) was immobilized on surface, and excess DNA was  
237 washed with 1× binding buffer. SpCas9-sgRNA complexes were prepared by mixing 50 nM  
238 SpCas9ΔREC3 and 50nM sgRNA in 1× binding buffer and incubated for 10 min at room  
239 temperature. SpCas9-sgRNA was diluted to 100 pM, introduced to the sample chamber and  
240 incubated for 10 min. Before data acquisition, 20 μL imaging buffer was flown into chamber.  
241 After data acquisition, the sample chamber was washed with 1× binding buffer. 20 μL imaging  
242 buffer supplemented with 1μM REC3 was flown into sample chamber and incubated for 10min.  
243 After incubation, data for REC3 complementation was collected.

244

245 **Microscopy and data analysis.** A prism-type TIRF microscope was setup using a Nikon Ti-E  
246 Eclipse inverted fluorescent microscope equipped with a 60× 1.20 N.A. Plan Apo water objective  
247 and the perfect focusing system (Nikon). A 532-nm solid state laser (Coherent Compass) and a  
248 633-nm HeNe laser (JDSU) were used for Cy3 and Cy5 excitation, respectively. Cy3 and Cy5

249 fluorescence were split into two channels using an Optosplit II image splitter (Cairn Instruments)  
250 and imaged separately on the same electron-multiplied charged-coupled device (EM-CCD)  
251 camera (512×512 pixels, Andor Ixon EM<sup>+</sup>). Effective pixel size of the camera was set to 267 nm  
252 after magnification. Movies for steady-state FRET measurements were acquired at 10 Hz under  
253 0.3 kW cm<sup>-2</sup> 532-nm excitation. Data analysis was performed as described previously<sup>10</sup>. Briefly,  
254 two fluorescent channels were registered with each other using fiducial markers (20 nm diameter  
255 Nile Red Beads, Life Technologies) to determine the Cy3/Cy5 FRET pairs. Cy3/Cy5 pairs that  
256 photobleached in one step and showed anti-correlated signal changes were used to build  
257 histograms. FRET values were corrected for donor leakage and the histograms were normalized  
258 to determine the percentage of distinct FRET populations.

259

260 **Human cell culture and transfection.** Descriptions of nuclease and guide RNA plasmids used  
261 for human cell culture are available in **Supplementary Table 1 and 2**. Nuclease variants were  
262 generated by isothermal assembly into JDS246 (Addgene #43861)<sup>5</sup>, and guide RNAs were  
263 cloned into BsmBI digested BPK1520 (Addgene #65777)<sup>25</sup>. Both U2OS cells (a gift from Toni  
264 Cathomen, Freiburg) and U2OS-EGFP cells (encoding a single integrated copy of a pCMV-  
265 EGFP-PEST cassette)<sup>26</sup> were cultured at 37 °C with 5% CO<sub>2</sub> in advanced DMEM containing  
266 10% heat-inactivated fetal bovine serum, 2 mM GlutaMax, penicillin/streptomycin, and 400 µg  
267 ml<sup>-1</sup> Geneticin (for U2OS-EGFP cells only). Cell culture reagents were purchased from Thermo  
268 Fisher Scientific, cell line identities were validated by STR profiling (ATCC) and deep-  
269 sequencing, and cell culture supernatant was tested bi-weekly for mycoplasma. Transfections  
270 were performed using a Lonza 4-D Nucleofector with the SE Kit and the DN-100 program on  
271 ~200k cells with 750 ng of nuclease and 250 ng of guide RNA plasmids.

272

273 **Human cell EGFP disruption assay.** *EGFP* disruption experiments were performed as  
274 previously described<sup>5,26</sup>. Briefly, transfected cells were analyzed ~52 hours post-transfection for  
275 loss of EGFP fluorescence using a Fortessa flow cytometer (BD Biosciences). Background loss  
276 was determined by gating a negative control transfection (containing nuclease and empty guide  
277 RNA plasmid) at ~2.5% for all experiments.

278

279 **T7 endonuclease I assay.** Roughly 72 hours post-transfection, genomic DNA was extracted  
280 from U2OS cells using the Agencourt DNAdvance Genomic DNA Isolation Kit (Beckman  
281 Coulter Genomics), and T7 endonuclease I assays were performed as previously described<sup>26</sup>.  
282 Briefly, 600–800 nt amplicons surrounding on-target sites were amplified from ~100 ng of  
283 genomic DNA using Phusion Hot-Start Flex DNA Polymerase (New England Biolabs) using the  
284 primers listed in Supplementary Table 2. PCR products were visualized (using a QIAxcel  
285 capillary electrophoresis instrument, Qiagen), and purified (Agencourt Ampure XP cleanup,  
286 Beckman Coulter Genomics), Denaturation and annealing of ~200 ng of the PCR product was  
287 followed by digestion with T7 endonuclease I (New England Biolabs). Digestion products were  
288 purified (Ampure) and quantified (QIAxcel) to approximate the mutagenesis frequencies induced  
289 by Cas9-sgRNA complexes.

290

291

292

293

294

## 295 REFERENCES

- 296 1 Doudna, J. A. & Charpentier, E. Genome editing. The new frontier of genome  
297 engineering with CRISPR-Cas9. *Science* **346**, 1258096, doi:10.1126/science.1258096  
298 (2014).
- 299 2 Hsu, P. D., Lander, E. S. & Zhang, F. Development and applications of CRISPR-Cas9 for  
300 genome engineering. *Cell* **157**, 1262-1278, doi:10.1016/j.cell.2014.05.010 (2014).
- 301 3 Mali, P., Esvelt, K. M. & Church, G. M. Cas9 as a versatile tool for engineering biology.  
302 *Nat Methods* **10**, 957-963, doi:10.1038/nmeth.2649 (2013).
- 303 4 Barrangou, R. & Horvath, P. A decade of discovery: CRISPR functions and applications.  
304 *Nat Microbiol* **2**, 17092, doi:10.1038/nmicrobiol.2017.92 (2017).
- 305 5 Fu, Y. *et al.* High-frequency off-target mutagenesis induced by CRISPR-Cas nucleases in  
306 human cells. *Nat Biotechnol* **31**, 822-826, doi:10.1038/nbt.2623 (2013).
- 307 6 Tsai, S. Q. *et al.* GUIDE-seq enables genome-wide profiling of off-target cleavage by  
308 CRISPR-Cas nucleases. *Nat Biotechnol* **33**, 187-197, doi:10.1038/nbt.3117 (2015).
- 309 7 Tsai, S. Q. & Joung, J. K. Defining and improving the genome-wide specificities of  
310 CRISPR-Cas9 nucleases. *Nat Rev Genet* **17**, 300-312, doi:10.1038/nrg.2016.28 (2016).
- 311 8 Slaymaker, I. M. *et al.* Rationally engineered Cas9 nucleases with improved specificity.  
312 *Science* **351**, 84-88, doi:10.1126/science.aad5227 (2016).
- 313 9 Kleinstiver, B. P. *et al.* High-fidelity CRISPR-Cas9 nucleases with no detectable  
314 genome-wide off-target effects. *Nature* **529**, 490-495, doi:10.1038/nature16526 (2016).
- 315 10 Dagdas, Y. S., Chen, J. S., Sternberg, S. H., Doudna, J. A. & Yildiz, A. A  
316 Conformational Checkpoint Between DNA Binding And Cleavage By CRISPR-Cas9.  
317 *bioRxiv* (2017).

- 318 11 Bisaria, N., Jarmoskaite, I. & Herschlag, D. Lessons from Enzyme Kinetics Reveal  
319 Specificity Principles for RNA-Guided Nucleases in RNA Interference and CRISPR-  
320 Based Genome Editing. *Cell Syst* **4**, 21-29, doi:10.1016/j.cels.2016.12.010 (2017).
- 321 12 Sternberg, S. H., LaFrance, B., Kaplan, M. & Doudna, J. A. Conformational control of  
322 DNA target cleavage by CRISPR-Cas9. *Nature* **527**, 110-113, doi:10.1038/nature15544  
323 (2015).
- 324 13 Jiang, F. *et al.* Structures of a CRISPR-Cas9 R-loop complex primed for DNA cleavage.  
325 *Science* **351**, 867-871, doi:10.1126/science.aad8282 (2016).
- 326 14 Palermo, G., Miao, Y., Walker, R. C., Jinek, M. & McCammon, J. A. Striking Plasticity  
327 of CRISPR-Cas9 and Key Role of Non-target DNA, as Revealed by Molecular  
328 Simulations. *ACS Cent Sci* **2**, 756-763, doi:10.1021/acscentsci.6b00218 (2016).
- 329 15 Palermo, G., Miao, Y., Walker, R. C., Jinek, M. & McCammon, J. A. CRISPR-Cas9  
330 conformational activation as elucidated from enhanced molecular simulations. *Proc Natl*  
331 *Acad Sci U S A*, doi:10.1073/pnas.1707645114 (2017).
- 332 16 Jinek, M. *et al.* A programmable dual-RNA-guided DNA endonuclease in adaptive  
333 bacterial immunity. *Science* **337**, 816-821, doi:10.1126/science.1225829 (2012).
- 334 17 Nishimasu, H. *et al.* Crystal structure of Cas9 in complex with guide RNA and target  
335 DNA. *Cell* **156**, 935-949, doi:10.1016/j.cell.2014.02.001 (2014).
- 336 18 Anders, C., Niewoehner, O., Duerst, A. & Jinek, M. Structural basis of PAM-dependent  
337 target DNA recognition by the Cas9 endonuclease. *Nature* **513**, 569-573,  
338 doi:10.1038/nature13579 (2014).

- 339 19 Jiang, F., Zhou, K., Ma, L., Gressel, S. & Doudna, J. A. STRUCTURAL BIOLOGY. A  
340 Cas9-guide RNA complex preorganized for target DNA recognition. *Science* **348**, 1477-  
341 1481, doi:10.1126/science.aab1452 (2015).
- 342 20 Majumdar, Z. K., Hickerson, R., Noller, H. F. & Clegg, R. M. Measurements of internal  
343 distance changes of the 30S ribosome using FRET with multiple donor-acceptor pairs:  
344 quantitative spectroscopic methods. *J Mol Biol* **351**, 1123-1145,  
345 doi:10.1016/j.jmb.2005.06.027 (2005).
- 346 21 Szczelkun, M. D. *et al.* Direct observation of R-loop formation by single RNA-guided  
347 Cas9 and Cascade effector complexes. *Proc Natl Acad Sci U S A* **111**, 9798-9803,  
348 doi:10.1073/pnas.1402597111 (2014).
- 349 22 Cencic, R. *et al.* Protospacer adjacent motif (PAM)-distal sequences engage CRISPR  
350 Cas9 DNA target cleavage. *PLoS One* **9**, e109213, doi:10.1371/journal.pone.0109213  
351 (2014).
- 352 23 Jinek, M. *et al.* Structures of Cas9 endonucleases reveal RNA-mediated conformational  
353 activation. *Science* **343**, 1247997, doi:10.1126/science.1247997 (2014).
- 354 24 Wright, A. V. *et al.* Rational design of a split-Cas9 enzyme complex. *Proc Natl Acad Sci*  
355 *U S A* **112**, 2984-2989, doi:10.1073/pnas.1501698112 (2015).
- 356 25 Kleinstiver, B. P. *et al.* Engineered CRISPR-Cas9 nucleases with altered PAM  
357 specificities. *Nature* **523**, 481-485, doi:10.1038/nature14592 (2015).
- 358 26 Reyon, D. *et al.* FLASH assembly of TALENs for high-throughput genome editing. *Nat*  
359 *Biotechnol* **30**, 460-465, doi:10.1038/nbt.2170 (2012).

360

361



362 **ACKNOWLEDGEMENTS**

363 We thank Addison V. Wright, Stephen N. Floor, Joshua C. Cofsky, David Burstein, Christof  
364 Fellman, Benjamin L. Oakes and Orestes Mavrothalassitis for discussions and critical reading of  
365 the manuscript, and Michelle S. Prew for technical assistance. J.S.C. acknowledges support from  
366 the National Science Foundation Graduate Research Fellowship program, and B.P.K. from  
367 Banting (Natural Sciences and Engineering Research Council of Canada) and Charles A. King  
368 Trust Postdoctoral Fellowships. J.A.D. is an Investigator of the Howard Hughes Medical  
369 Institute. This work has been supported by NIH (GM094522 and GM118773 (A.Y.), R35  
370 GM118158 (J.K.J.)), NSF (MCB-1617028 (A.Y.) and MCB-1244557 (J.A.D.)), and the  
371 Desmond and Ann Heathwood MGH Research Scholar Award (J.K.J.).

372

373 **AUTHOR CONTRIBUTIONS**

374 J.S.C., Y.S.D. and B.P.K. conceived of and designed experiments with input from L.B.H., S.H.S,  
375 J.K.J., A.Y. and J.A.D. J.S.C. performed protein expression, labeling and biochemical  
376 experiments. Y.S.D. performed single-molecule fluorescence assays and data analysis. B.P.K.  
377 and M.M.W. performed human cell-based experiments. J.S.C., Y.S.D., B.P.K., J.K.J., A.Y. and  
378 J.A.D. wrote the manuscript.

379

380 **COMPETING FINANCIAL INTERESTS**

381 J.K.J. has financial interests in Beacon Genomics, Beam Therapeutics, Editas Medicine, Pairwise  
382 Plants, Poseida Therapeutics, and Transposagen Biopharmaceuticals. J.K.J.'s interests were  
383 reviewed and are managed by Massachusetts General Hospital and Partners HealthCare in  
384 accordance with their conflict of interest policies. J.A.D. is a co-founder of Caribou Biosciences,

385 Editas Medicine, and Intellia Therapeutics; a scientific advisor to Caribou, Intellia, eFFECTOR  
386 Therapeutics and Driver; and executive director of the Innovative Genomics Institute at UC  
387 Berkeley and UCSF. S.H.S. is an employee of Caribou Biosciences, Inc. and an inventor on  
388 patent applications related related to CRISPR-Cas systems and uses thereof. J.S.C, Y.S.D.,  
389 B.P.K, L.B.H., S.H.S., A.Y., J.K.J. and J.A.D. are inventors on patents for CRISPR technologies.

390

391

392

393

394

395

396

397

398

399

400

401

402

403

404

405

406

407

408 **FIGURE 1**

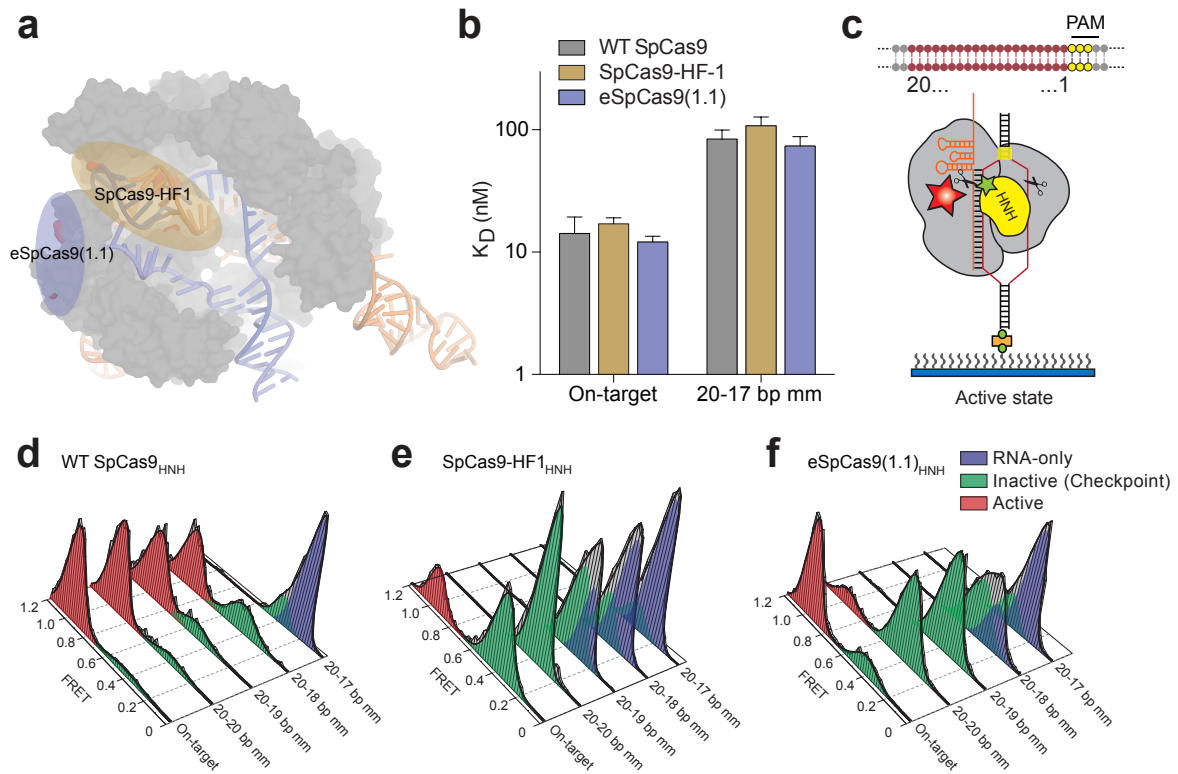

409

410 **Figure 1 | High-fidelity Cas9 variants enhance cleavage specificity through HNH**

411 **conformational control.** **a**, Locations of amino acid alterations present in existing high-fidelity

412 SpCas9 variants mapped onto the dsDNA-bound SpCas9 crystal structure (5F9R), with the HNH

413 domain omitted for clarity. **b**, Dissociation constants comparing WT SpCas9, SpCas9-HF1 and

414 eSpCas9(1.1) with perfect and a 20-17 bp mismatched target. Error bars, s.d.;  $n = 3$ . **c**, Cartoon

415 of DNA-immobilized SpCas9 complexes for smFRET experiments with DNA target numbering

416 scheme. **d-f**, smFRET histograms measuring HNH conformational activation with **d**, WT

417 SpCas9<sub>HNH</sub>, **e**, SpCas9-HF1<sub>HNH</sub> and **f**, eSpCas9(1.1)<sub>HNH</sub> bound to perfect and PAM-distal

418 mismatched targets. Black curves represent a fit to multiple Gaussian peaks.

419

420

421 **FIGURE 2**

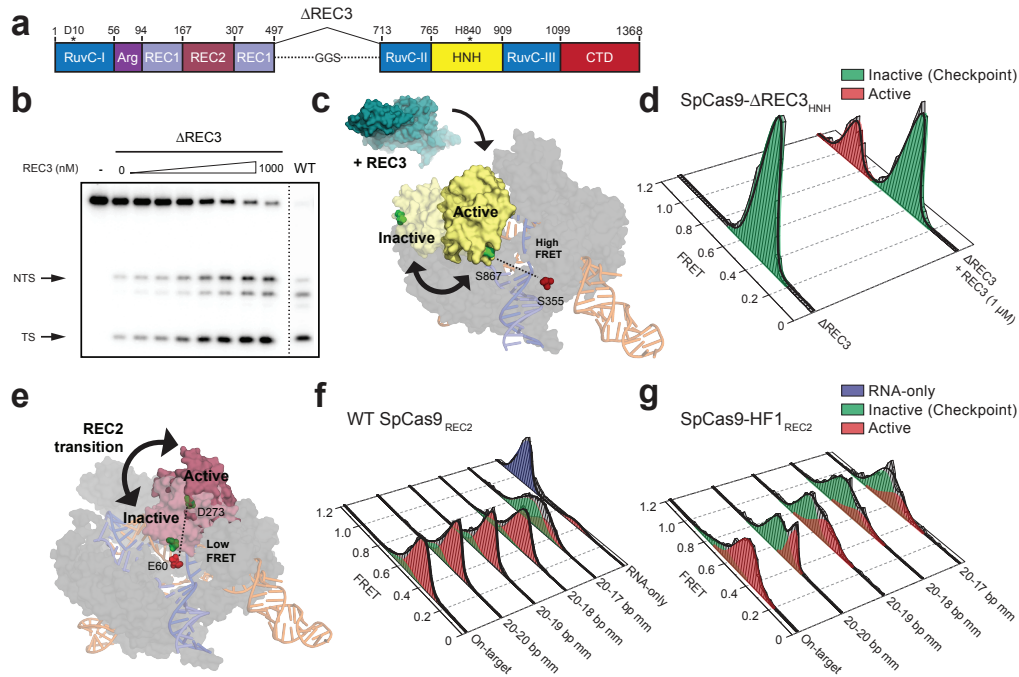

422

423 **Figure 2 | The alpha-helical lobe regulates HNH domain activation.** **a**, Domain organization

424 of SpCas9ΔREC3. **b**, Perfect target DNA cleavage assay using SpCas9ΔREC3 with increasing

425 concentrations of REC3 domain supplied in *trans*, resolved by denaturing PAGE. **c**, Schematic

426 of SpCas9ΔREC3<sub>HNH</sub> with FRET dyes at positions S355C and S867C, with the REC3 domain

427 added *in trans*. Inactive to active structures represent HNH in the sgRNA-bound (PDB ID:

428 4ZT0) to dsDNA-bound (PDB ID: 5F9R) forms, respectively. **d**, smFRET histograms measuring

429 HNH conformational states with SpCas9ΔREC3<sub>HNH</sub> in the absence and presence of the REC3

430 domain. **e**, Schematic of SpCas9<sub>REC2</sub> with FRET dyes at positions E60C and D273C, with HNH

431 domain omitted for clarity. Inactive to active structures represent REC2 in the sgRNA-bound

432 (PDB ID: 4ZT0) to dsDNA-bound (PDB ID: 5F9R) forms, respectively. **f-g**, smFRET

433 histograms measuring REC2 conformational states with **f**, WT SpCas9<sub>REC2</sub> and **g**, SpCas9-

434 HF1<sub>REC2</sub> bound to perfect and PAM-distal mismatched targets. For panels **d**, **f** and **g**, black

435 curves represent a fit to multiple Gaussian peaks.



452 **FIGURE 4**

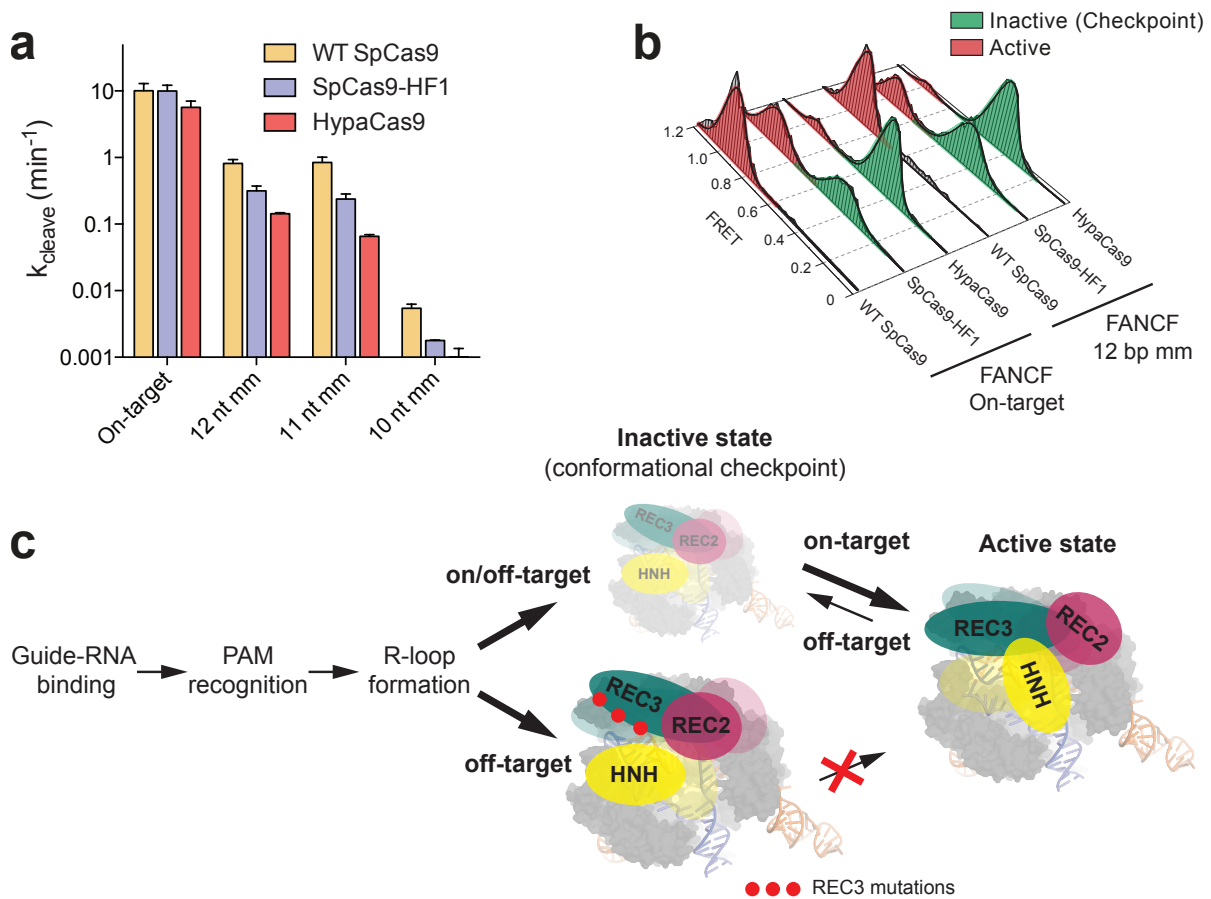

453

454 **Figure 4 | Mutating residues involved in proofreading increases the threshold for**

455 **conformational activation to ensure targeting accuracy. a, DNA cleavage kinetics of SpCas9**

456 **variants with the *FANCF* site 1 on-target and internally mismatched substrates. Error bars, s.d.;  $n$**

457 **= 3. b, smFRET histograms measuring HNH conformational states for indicated SpCas9 variants**

458 **with a *FANCF* site 1 on-target and mismatched substrate at the 12<sup>th</sup> position; black curves**

459 **represent a fit to multiple Gaussian peaks. c, Model for alpha-helical lobe sensing and regulation**

460 **of the RNA/DNA heteroduplex for HNH activation and cleavage.**
